24 **Abstract**

25 *Background:* Children born extremely preterm are at heightened risk for intellectual and social  
26 impairment, including Autism Spectrum Disorder (ASD). There is increasing evidence for a key role of the  
27 placenta in prenatal developmental programming, suggesting that the placenta may explain origins of  
28 neurodevelopmental outcomes.

29

30 *Methods:* We examined associations between placental genomic and epigenomic profiles and assessed  
31 their ability to predict intellectual and social impairment at age 10 years in 379 children from the  
32 Extremely Low Gestational Age Newborn (ELGAN) cohort. Assessment of intellectual ability (IQ) and  
33 social function was completed with the Differential Ability Scales-II (DAS-II) and Social Responsiveness  
34 Scale (SRS), respectively. Examining IQ and SRS allows for studying ASD risk beyond the diagnostic  
35 criteria, as IQ and SRS are continuous measures strongly correlated with ASD. Genome-wide mRNA,  
36 CpG methylation and miRNA were assayed with the Illumina Hiseq 2500, HTG EdgeSeq miRNA Whole  
37 Transcriptome Assay, and Illumina EPIC/850K array, respectively. We conducted genome-wide  
38 differential mRNA/miRNA and epigenome-wide placenta analyses. These molecular features were  
39 integrated for a predictive analysis of IQ and SRS outcomes using kernel aggregation regression. We  
40 lastly examined associations between ASD and the genomically-predicted component of IQ and SRS.

41

42 *Results:* Genes with important roles in placenta angiogenesis and neural function were associated with  
43 intellectual and social impairment. Kernel aggregations of placental multi-omics strongly predicted  
44 intellectual and social function, explaining approximately 8% and 12% of the variance in SRS and IQ  
45 scores via cross-validation, respectively. Predicted in-sample SRS and IQ showed significant positive and  
46 negative associations with ASD case-control status.

47

48 *Limitations:* The ELGAN is a cohort of children born pre-term, and generalization may be affected by  
49 unmeasured confounders associated with low gestational age. We conducted external validation of  
50 predictive models, though the sample size of the out-sample dataset ( $N = 49$ ) and the scope of the  
51 available placental datasets are limited. Further validation of the models is merited.

52

53 *Conclusions:* Aggregating information from biomarkers within and between molecular data types  
54 improves prediction of complex traits like social and intellectual ability in children born extremely preterm,  
55 suggesting that traits influenced by the placenta-brain axis may be omnigenic.

56

57 **Keywords:** prenatal neurodevelopmental programming, social and cognitive impairment, placental gene  
58 regulation, epigenome-wide association, differential expression analysis, multi-omic aggregation

59 **Background**

60 Despite substantial research efforts to elucidate the etiology of neurodevelopmental impairment [1], little  
61 is known about genomic and epigenomic factors influencing trajectories of neurodevelopment, such as  
62 those associated with preterm delivery [2]. Children born extremely preterm are at increased risk not only  
63 for intellectual impairment but also for Autism Spectrum Disorder (ASD) [3,4], often accompanied by  
64 intellectual disability. In addition, preterm-born children have consistently been observed to manifest  
65 social difficulties (e.g., fewer prosocial behaviors) in childhood and adolescence that do not meet  
66 diagnostic criteria for ASD [5].

67  
68 The placenta is posited as a critical determinant of both immediate and long-lasting neurodevelopmental  
69 outcomes in children [1]. The placenta is involved in hormone and neurotransmitter production and  
70 transfer of nutrients to the fetus, thus having direct influence on brain development. This connection  
71 between the placenta and the brain is termed the placenta-brain axis [6]. Epidemiological and animal  
72 studies have linked genomic and epigenomic alterations in the placenta with neurodevelopmental  
73 disorders and normal neurobehavioral development [7–9]. For example, the Markers of Autism Risk in  
74 Babies: Learning Early Signs (MARBLES) study has identified differentially methylated region containing  
75 putative fetal brain enhancer between in placentas from ASD ( $N = 24$ ) and typically developing ( $n = 23$ )  
76 children [10]. However, identifying genomic signatures of risk for neurodevelopmental disorders such as  
77 ASD in placenta is a challenging. Further study of molecular interactions representing the placenta-brain  
78 axis may advance our understanding of fetal mechanisms involved in aberrant neurodevelopment [6].

79  
80 Most prior studies have investigated single molecular levels of the placenta genome or epigenome,  
81 precluding analysis of possible interactions that could be linked to neurodevelopmental outcomes.  
82 Examining only a single molecular feature, or a single type of features even at a genomic scale can still  
83 result in much unexplained variation in phenotype due to potentially important interactions between  
84 multiple features [11,12]. This observation is in line with Boyle *et al.*'s omnigenic model [13,14], which  
85 proposes that gene regulatory networks are so highly interconnected that a large portion of the heritability  
86 of complex traits can be explained by effects on genes outside core pathways. Molecular integration to

87 identify pathways for fetal neurodevelopment in children has been unexplored but may prove to be  
88 insightful in associations with complex diseases [15].

89

90 We conducted a genome-wide analysis of DNA methylation, miRNA, and mRNA expression in the  
91 placenta, examining individual associations with social and intellectual impairment at 10 years of age in  
92 children from the Extremely Low Gestational Age Newborn (ELGAN) study [16]. We then combined the  
93 genomic and epigenomic data to identify correlative networks of placental genomic and epigenomic  
94 biomarkers predictive of social and intellectual impairment as continuous scales, thus allowing us to study  
95 neurodevelopmental difficulties beyond the ASD diagnostic categories [17]. To assess the convergent  
96 validity of our behavioral findings, we also examined the association of social and intellectual impairment  
97 in relation to ASD diagnoses [18]. To our knowledge, this is the first study to use multiple placental  
98 molecular signatures to predict intellectual and social impairment, which may inform a framework for  
99 predicting risk of adverse neurocognitive and neurobehavioral outcomes in young children.

100

## 101 **Methods**

### 102 *ELGAN recruitment and study participants*

103 From 2002-2004, women who gave birth at under 28 weeks gestation at one of 14 medical centers  
104 across five U.S. states enrolled in the ELGAN study [16]. The Institutional Review Board at each  
105 participating institution approved study procedures. Included were 411 of 889 children with both placental  
106 molecular analysis and a 10-year follow-up assessment.

107

### 108 *Social and cognitive function and ASD at 10 years of age*

109 Trained child psychologist examiner [5,19] evaluated general cognitive ability (IQ) with the School-Age  
110 Differential Ability Scales-II (DAS-II) Verbal and Nonverbal Reasoning subscales [20]. The Social  
111 Responsiveness Scale (SRS) was used to assess severity of ASD-related social deficits in 5 subdomains:  
112 social awareness, social cognition, social communication, social motivation, and autistic mannerisms [21].  
113 We used the gender-normed T-score (SRS-T; intended to correct gender differences observed in  
114 normative samples) as continuous measure of social deficit [22]. All participants were assessed for ASD

115 [18]. Diagnostic assessment of ASD was conducted with three well-validated measures, administered  
116 sequentially. First, the Social Communication Questionnaire (SCQ) was administered to screen for  
117 potential ASD, using a score  $\geq 11$  to increase sensitivity relative to the standard criterion score of  $\geq 15$   
118 [18,23]. For children who screened positive on the SCQ criterion, we conducted the Autism Diagnostic  
119 Interview–Revised (ADI-R) with the primary caregiver [24]. All children who met ADI-R criteria for ASD, or  
120 who had a prior clinical diagnosis of ASD and/or exhibited symptoms of ASD during cognitive testing  
121 according to the site psychologist) were then assessed with the Autism Diagnostic Observation Schedule,  
122 Second Version (ADOS-2), which served as the criterion measure of ASD in this study [25]. All ADOS-2  
123 administrations were independently scored by a second rater with autism diagnostic and ADOS-2  
124 expertise. In cases of scoring disagreements, consensus was reached via discussion between raters.  
125 Item-by-item inter-rater agreement for the 14 ADOS-2 diagnostic algorithm scores was on average 0.93  
126 ( $SD = 0.12$ ). These developmental assessment procedures and all relevant test scores for ASD and  
127 intellectual function are reported in a prior publication [19].

128

#### 129 *Placental DNA and RNA extraction*

130 After delivery, placentas were biopsied under sterile conditions. We collected a piece of the chorion,  
131 representing the fetal side of the placenta [26]. More specifically, placentas were placed in a sterilized  
132 basin and biopsied by pulling back the amnion to expose the chorion at the midpoint of the longest  
133 distance between the cord insertion and edge of the placental disk. A sample from the *fetal side* of the  
134 placenta was removed by applying traction to the chorion and underlying trophoblast tissue. The  
135 specimen was placed in a cryogenic vial and immersed in liquid nitrogen. To preserve DNA and RNA  
136 integrity, specimens were stored at  $-80^{\circ}\text{C}$  until processed. For processing, a 0.2g subsection of the  
137 placental tissue was cut from the frozen biopsy and washed with sterile 1x phosphate-buffered saline to  
138 remove any remaining blood. Samples were homogenized using a lysis buffer, and the homogenate was  
139 separated into aliquots. This process was detailed in a prior publication [27]. Nucleic acids were extracted  
140 from the homogenate using AllPrep DNA/RNA/miRNA Universal kit (Qiagen, Germany). The quantity and  
141 quality of DNA and RNA were analyzed using the NanoDrop 1000 spectrophotometer and its integrity  
142 verified by the Agilent 2100 BioAnalyzer.

143

144 *Epigenome-wide placental DNA methylation*

145 Extracted DNA sequences were bisulfate-converted using the EZ DNA methylation kit (Zymo Research,  
146 Irvine, CA) and followed by quantification using the Infinium MethylationEPIC BeadChip (Illumina, San  
147 Diego, CA), which measures CpG loci at a single nucleotide resolution, as previously described [26–29].  
148 Quality control and normalization were performed resulting in 856,832 CpG probes from downstream  
149 analysis, with methylation represented as the average methylation level at a single CpG site ( $\beta$ -value)  
150 [27,30–32]. DNA methylation data was imported into R for pre-processing using the *minfi* package [30].  
151 Quality control was performed at the sample level, excluding samples that failed and technical duplicates;  
152 411 samples were retained for subsequent analyses. Functional normalization was performed with a  
153 preliminary step of normal-exponential out-of band (*noob*) correction method [33] for background  
154 subtraction and dye normalization, followed by the typical functional normalization method with the top  
155 two principal components of the control matrix [31,34]. Quality control was performed on individual probes  
156 by computing a detection  $P$  value and excluded 806 (0.09%) probes with non-significant detection ( $P >$   
157 0.01) for 5% or more of the samples. A total of 856,832 CpG sites were included in the final analyses.  
158 Lastly, the *ComBat* function was used from the *sva* package to adjust for batch effects from sample plate  
159 [83]. The data were visualized using density distributions at all processing steps. Each probe measured  
160 the average methylation level at a single CpG site. Methylation levels were calculated and expressed as  
161  $\beta$  values ( $\beta = \text{intensity of the methylated allele } (M) / (\text{intensity of the unmethylated allele } (U) + \text{intensity of}$   
162  $\text{the methylated allele } (M) + 100)$ ).  $\beta$  values were logit transformed to  $M$  values for statistical analyses [35].

163

164 *Genome-wide placental mRNA and miRNA expression*

165 mRNA expression was determined using the Illumina QuantSeq 3' mRNA-Seq Library Prep Kit, a method  
166 with high strand specificity. mRNA-sequencing libraries were pooled and sequenced (single-end 50 bp)  
167 on one lane of the Illumina HiSeq 2500. mRNA were quantified through pseudo-alignment with *Salmon*  
168 v.14.0 [36] mapped to the GENCODE Release 31 (GRCh37) reference transcriptome. miRNA expression  
169 profiles were assessed using the HTG EdgeSeq miRNA Whole Transcriptome Assay (HTG Molecular  
170 Diagnostics, Tucson, AZ). miRNA were aligned to probe sequences and quantified using the HTG

171 EdgeSeq System [37]. Genes and miRNAs with less than 5 counts for each sample were filtered,  
172 resulting in 11,224 genes and 2,047 miRNAs for downstream analysis. Distributional differences between  
173 lanes were first upper-quartile normalized [38]. Unwanted technical and biological variation (e.g. tissue  
174 heterogeneity) was then estimated using *RUVSeq* [39], where we empirically defined transcripts not  
175 associated with outcomes of interest as negative control housekeeping probes [40]. One dimension of  
176 unwanted variation was removed from the variance-stabilized transformation of the gene expression data  
177 using the *limma* package [40–43]

178

### 179 Statistical Analysis

180 All code and functions used in the statistical analysis can be found at [https://github.com/bhattacharya-a-](https://github.com/bhattacharya-a-bt/multiomics_ELGAN)  
181 [bt/multiomics\\_ELGAN](https://github.com/bhattacharya-a-bt/multiomics_ELGAN).

182

### 183 *Correlative analyses between SRS, IQ, and ASD*

184 Associations among SRS scores, IQ and ASD were assessed using Pearson correlations with estimated  
185 95% confidence intervals, and the difference in distributions of SRS and IQ across ASD case-control was  
186 assessed using Wilcoxon rank-sum tests. Associations between demographic variables (race, sex,  
187 maternal age, number of gestational days, maternal smoking status, placental inflammation, birth weight  
188 Z-score and mother's insurance) with SRS and IQ were assessed using multivariable regression,  
189 assessing the significance of regression parameters using Wald tests of significance and adjusting for  
190 multiple testing with the Benjamini-Hochberg procedure [44].

191

### 192 *Genome-wide molecular associations with SRS and IQ*

193 Once associations between SRS and IQ and ASD were confirmed, we utilized continuous SRS and IQ  
194 measures as the main outcomes of interest. Associations between mRNA expression or miRNA  
195 expression with SRS and IQ were estimated through a negative binomial linear model using *DESeq2* [43].  
196 Epigenome-wide associations (EWAS) of CpG methylation sites with outcomes were assessed using  
197 robust linear regression [45] with test statistic modification through an empirical Bayes procedure [42],  
198 described previously [27]. Both the differential mRNA and miRNA expression and EWAS models



199 controlled for the following covariates: race, age, sex, number of gestational age days, birth weight Z-  
200 score, and education level of the mother. Multiple testing was adjusted for using the Benjamini-Hochberg  
201 procedure [44].

202

### 203 *Placental multi-molecular prediction of SRS and IQ*

204 We next assessed how well an aggregate of one or more of the molecular datasets (CpG methylation,  
205 mRNA expression, and miRNA expression) predicted continuous SRS and IQ scores. The analytical  
206 scheme is summarized in **Figure 1**, using 379 samples with data for all three molecular datasets (DNA  
207 methylation, miRNA, and mRNA). Briefly, we first adjusted the outcome variables and molecular datasets  
208 for above noted demographic and clinical covariates using *limma* [46] to account for associations  
209 between the outcomes and these covariates in the eventual predictive models. Next, to model the  
210 covariance between samples within a single molecular profile, we aggregated the molecular datasets with  
211 thousands of biomarkers each into a *molecular kernel* matrix. A *molecular kernel* matrix represents the  
212 inter-sample similarities in a given molecular profile (**Supplementary Methods**). A linear or non-linear  
213 kernel aggregation may aid in prediction of complex traits by capturing non-additive effects [47–50], which  
214 represents a sizable portion of phenotypic variation [51,52]. Using all individual, pairwise, and triplet-wise  
215 combinations of molecular kernel matrices, we fitted predictive models of SRS and IQ based on linear  
216 mixed modeling [50] or kernel regression least squares (KRLS) [53] and assessed predictive performance  
217 with McNemar’s adjusted  $R^2$  via Monte Carlo cross validation [54]. We also optimized predictive models  
218 for the number of included biomarkers per molecular profile. Extensive model details, as well as  
219 alternative models considered, are detailed in **Supplemental Methods**.

220

### 221 *Validation in external dataset*

222 Lack of studies that consider placental mRNA, CpG methylation and miRNA data with long-term child  
223 neurodevelopment limit the ability to establish external validation. We obtained one external placental  
224 CpG methylation dataset from the Markers of Autism Risk in Babies-Learning Early Signs (MARBLEs)  
225 cohort [10]. To assess out-of-sample performance of kernel models for methylation, we downloaded  
226 MethylC-seq data for 47 placenta samples, 24 of which identified as ASD cases (NCBI Gene Expression

227 Omnibus accession numbers GSE67615) [10].  $\beta$ -values for DNA methylation were extracted from BED  
228 files and transformed into  $M$ -values with an offset of 1 [35], and used the best methylation-only predictive  
229 model to predict SRS and IQ in these 47 samples, as detailed in **Supplemental Methods**.

230

### 231 *Correlative networks*

232 In the final KRLS predictive models for both IQ and SRS including all three molecular profiles, we  
233 extracted the top 50 most predictive (largest point-wise effect sizes) CpGs, miRNAs, and mRNAs of SRS  
234 and IQ. A sparse correlative network was inferred among these biomarkers that links biomarkers based  
235 on the strength of correlative signals using graphical lasso in *qgraph* [55,56].

236

## 237 **Results**

### 238 *SRS and IQ are well associated with ASD*

239 Although the sample is enriched for ASD cases ( $N = 35$  cases, 9.3% of the sample) relative to non-  
240 preterm cohorts, there is still a relatively low case-control ratio for a genome-wide study of this sample  
241 size (descriptive statistics for relevant covariates in **Table 1**). Therefore, we considered continuous  
242 measures of social impairment (SRS) and cognitive development (IQ) at age 10 for both associative and  
243 predictive analyses. Using continuous variables for SRS and IQ allow us to study complexities beyond  
244 the ASD diagnostic categories [15,17]. **Figure 2A-B** shows the relationship between SRS, IQ, and ASD.  
245 The mean SRS is significantly higher in ASD cases compared to controls (mean difference of 1.74,  
246 95%  $CI$ : (1.41, 2.07)). Mean IQ is significantly lower in ASD cases versus controls (mean difference of -  
247 2.23, 95%  $CI$  (-2.46, -1.96)). Furthermore, SRS and IQ are negatively correlated (Pearson  $\rho =$   
248  $-0.47$ , 95%  $CI$ : (-0.55, -0.39)). We also measured associations between demographic characteristics  
249 with SRS and IQ (**Figure 2C**) using multivariable regression. Male sex is associated with lower IQ, while  
250 public health insurance is associated with both lower IQ and increased social impairment. Demographic  
251 variables included in the multivariable regression explain approximately 12% and 15% of the total  
252 variance explained in IQ and SRS, as measured by adjusted  $R^2$ , with a summary of regression  
253 parameters in **Table 2**. Based on the associations identified here and the value of inclusion of continuous  
254 measures, subsequent genomic and epigenomic analyses control for demographic covariates.

255 *Table 1: Descriptive statistics for demographi and clinical covariates*

| <b>Continuous Variable</b>       |                   | <b>Mean, SD, Median</b>    |
|----------------------------------|-------------------|----------------------------|
| <i>Maternal age</i>              |                   | 29.6, 6.61, 29.5           |
| <i>Gestational days</i>          |                   | 182.5, 9.17, 184.0         |
| <b>Categorical Variable</b>      |                   | <b>Number (Proportion)</b> |
| <i>ASD</i>                       |                   |                            |
|                                  | <i>Case</i>       | 35 (9.3%)                  |
|                                  | <i>Control</i>    | 344 (90.7%)                |
| <i>Race</i>                      |                   |                            |
|                                  | <i>White</i>      | 233 (61.5%)                |
|                                  | <i>Black</i>      | 112 (29.5%)                |
|                                  | <i>Other</i>      | 34 (9.0%)                  |
| <i>Sex of baby</i>               |                   |                            |
|                                  | <i>Female</i>     | 180 (47.5%)                |
|                                  | <i>Male</i>       | 199 (52.5%)                |
| <i>Mother's smoking status</i>   |                   |                            |
|                                  | <i>Non-smoker</i> | 340 (89.7%)                |
|                                  | <i>Smoker</i>     | 39 (10.3%)                 |
| <i>Mother's insurance status</i> |                   |                            |
|                                  | <i>Private</i>    | 251 (66.2%)                |
|                                  | <i>Medicaid</i>   | 128 (33.8%)                |

256

257

258 *Table 2: Summary of regressions of SRS and IQ against clinical covariates.*

| <b>Parameter</b>              | <b>SRS</b>           |                                           | <b>IQ</b>            |                                           |               |
|-------------------------------|----------------------|-------------------------------------------|----------------------|-------------------------------------------|---------------|
|                               | <b>Estimate (SE)</b> | <b>FDR-adjusted P-value (Raw P-value)</b> | <b>Estimate (SE)</b> | <b>FDR-adjusted P-value (Raw P-value)</b> |               |
| <i>Race</i>                   | <i>Black</i>         | 0.219 (0.13)                              | 0.165 (0.091)        | -0.369 (0.13)                             | 0.012 (0.004) |
|                               | <i>Other</i>         | 0.375 (0.19)                              | 0.087 (0.043)        | -0.113 (0.18)                             | 0.684 (0.533) |
| <i>Sex</i>                    | <i>Male</i>          | 0.119 (0.10)                              | 0.342 (0.243)        | -0.288 (0.10)                             | 0.012 (0.004) |
|                               | <i>Female</i>        | -0.002 (0.01)                             | 0.800 (0.800)        | -0.003 (0.01)                             | 0.792 (0.748) |
| <i>Smoking status</i>         | <i>Yes</i>           | 0.215 (0.17)                              | 0.334 (0.204)        | 0.337 (0.17)                              | 0.087 (0.043) |
| <i>Mother's insurance</i>     | <i>Medicaid</i>      | 0.454 (0.13)                              | 0.002 (0.001)        | -0.453 (0.13)                             | 0.003 (0.001) |
| <i>Gestational days</i>       |                      | -0.017 (0.01)                             | 0.012 (0.002)        | 0.012 (0.01)                              | 0.087 (0.043) |
| <i>Birthweight Z-score</i>    |                      | -0.060 (0.05)                             | 0.342 (0.247)        | 0.179 (0.05)                              | 0.003 (0.001) |
| <i>Placental inflammation</i> |                      | -0.042 (0.11)                             | 0.793 (0.705)        | -0.046 (0.11)                             | 0.793 (0.677) |

259

260

261 *Genome-wide associations of mRNA, miRNA, and CpGs with SRS and IQ*

262 Genome-wide association tests between each of the individual placental molecular datasets (e.g. the

263 placental mRNA data, the CpG methylation, or the miRNA datasets) in relation to SRS and IQ (see

264 **Methods**) identified two genes with mRNA expression significantly associated with SRS at FDR-adjusted  
 265  $P < 0.01$  (Hdc Homolog, Cell Cycle Regulator [*HECA*], LIM Domain Only 4 [*LMO4*]). We did not find CpG  
 266 sites or miRNAs associated with SRS (**Table 3**). Associations between IQ and the mRNA expression, at  
 267 FDR-adjusted  $P < 0.01$ , were observed at four genes, namely Ras-Related Protein Rab-5A (*RAB5A*),  
 268 Transmembrane Protein 167A (*TMEM167A*), Signal Transducer and Activator of Transcription 2 (*STAT2*),  
 269 ITPRIP Like 2 (*ITPRIPL2*). One CpG site (*cg09418354* located in the gene Carbohydrate  
 270 Sulfotransferase 11 (*CHST11*) displayed an association with IQ, and no miRNAs were associated with IQ  
 271 (**Table 3**). Manhattan plots (**Supplemental Figure 1**) show the strength of associations of all biomarkers  
 272 by genomic position. Summary statistics for these associations are provided in **Supplemental Materials**.  
 273 No mRNAs, CpG sites, or miRNAs were significantly associated with both SRS and IQ, though effect  
 274 sizes for associations with the same features were in opposite directions (see **Supplemental Materials**).  
 275  
 276 *Table 3*: Summary of genome-wide associations of molecular profiles with SRS and IQ at FDR-adjusted  
 277  $P < 0.01$ .

| <b>SRS</b>                  |                    |                                 |
|-----------------------------|--------------------|---------------------------------|
| <b>Biomarker</b>            | <b>Effect size</b> | <b>FDR-adjusted<br/>P-value</b> |
| <i>mRNA expression</i>      |                    |                                 |
| <i>HECA</i>                 | 0.571              | 0.001                           |
| <i>LMO4</i>                 | 0.467              | 0.001                           |
| <b>IQ</b>                   |                    |                                 |
| <b>Biomarker</b>            |                    |                                 |
| <i>mRNA expression</i>      |                    |                                 |
| <i>RAB5A</i>                | -0.516             | 0.002                           |
| <i>TMEM167A</i>             | -0.632             | 0.004                           |
| <i>ITPRIPL2</i>             | -0.557             | 0.004                           |
| <i>STAT2</i>                | -0.584             | 0.004                           |
| <i>CpG methylation site</i> |                    |                                 |
| <i>cg09418354</i>           | -0.005             | 0.002                           |

278

279

280 *Kernel regression shows predictive utility in aggregating multiple molecular datasets*

281 Because the genome wide association analyses revealed few mRNAs, CpG sites or miRNAs that were

282 associated with SRS or IQ with large effect sizes, we next assessed the impact of aggregating these

283 molecular datasets on prediction of SRS and IQ. This was done to account for the considerable number

284 of biomarkers that have moderate effect sizes on outcome. To find the most parsimonious model with the  
285 greatest predictive performance, we first selected the optimal number of biomarkers per molecular profile  
286 for each outcome that gave the largest mean adjusted  $R^2$  in predictive models with only one of the three  
287 molecular datasets (see **Supplemental Methods**). **Figure 3A** shows the relationship between the  
288 number of biomarkers from the mRNA expression, CpG level, miRNA expression datasets and their  
289 predictive performance. In general, predictive performance steadily increased as the number of biomarker  
290 features increased until reaching a tipping point where predictive performance decreased (**Figure 3A**).  
291 Overall, for CpG methylation, the top (lowest  $P$ -values of association) 5,000 CpG features showed the  
292 greatest predictive performance, and for the mRNA and miRNA expression datasets, the top 1,000  
293 features showed the greatest predictive performance.

294  
295 Using the fully-tuned 7,000 biomarkers (5,000 for CpG methylation and 1,000 for both mRNA and miRNA  
296 expression) per molecular dataset with feature selection done in the training set, we trained predictive  
297 models (both linear and Gaussian kernel models) using all individual, pair-wise, and triplet-wise  
298 combinations of the three molecular datasets. **Figure 3B** shows that whereas the mRNA had the lowest  
299 predicted performance to both IQ ( $R^2 = 0.025$ ) and SRS ( $R^2 = 0.025$ ), aggregating the mRNA expression,  
300 CpG methylation and miRNA expression datasets tends to increase the predictive performance.  
301 Specifically, in relation to both outcomes (SRS and IQ), the model using all three integrated datasets  
302 shows the greatest predictive performance (mean adjusted  $R^2 = 0.11$  in IQ and  $R^2 = 0.08$  in SRS).

303

#### 304 *Correlative networks of placental biomarkers*

305 To gain further understanding of the associations among the identified mRNA, CpG and miRNA  
306 biomarkers in the context of IQ and SRS, we extracted ( $n = 50$ ) mRNA, CpGs, and miRNAs that have the  
307 largest effect sizes on IQ and SRS in the kernel regression models and inferred sparse correlative  
308 networks using the graphical lasso [55,56] (see **Methods**). In the networks (**Supplemental Figure 2**),  
309 each molecular dataset clusters by itself, with minimal nodes extending between molecular datasets, and  
310 more interconnection is observed between miRNAs and CpG methylation versus mRNAs. These  
311 networks point to genes that play important roles in placental angiogenesis and neural function, such as

312 *SMARCA2* (SWI/SNF Related, Matrix Associated, Actin Dependent Regulator Of Chromatin, Subfamily A,  
313 Member 2), *SLIT3* (Slit Guidance Ligand 3), and *LZTS2* (Leucine Zipper Tumor Suppressor 2) that have  
314 been previously associated with neurodevelopmental disorders, including intellectual disability, social  
315 impairment, mood disorders, and ASD [57–62].

316

317 *Validation of in-sample and out-sample SRS and IQ prediction with ASD case and control*

318 To contextualize our predictions, we tested whether the predicted SRS and IQ scores generated by our  
319 kernel models are associated with ASD case-control status; these predicted SRS and IQ scores  
320 represent the portion of the observed SRS and IQ values that our models can predict from placental  
321 genomic features. We used the optimal 7,000 biomarker features identified with a 10-fold cross-validation  
322 process, splitting samples into 10 hold-out sets and using the remaining samples as a training set to  
323 predict SRS and IQ for all 379 samples. After accounting for covariates, the predicted SRS and IQ values  
324 from the biomarker data were well-correlated with the observed clinical SRS and IQ values, explaining  
325 approximately 8% (approximate Spearman  $\rho = 0.29$ , cross-validation  $R^2$  P-value  $P = 7.5 \times 10^{-9}$ ) and  
326 12% (Spearman  $\rho = 0.35$ ,  $P = 3.6 \times 10^{-12}$ ) of the variance in the observed SRS and IQ variables,  
327 respectively. In addition, we found strong association between the predicted SRS and IQ with ASD case  
328 and controls, mean difference of  $-0.56$  (test statistic  $W = 8121$ ,  $P = 6.6 \times 10^{-4}$ ) for IQ, and mean  
329 difference of  $0.33$  ( $W = 4717$ ,  $P = 0.03$ ) for SRS (**Figure 4**).

330

331 Because we lacked an external dataset with all three molecular data (mRNA, CpG methylation, and  
332 miRNA) and cognitive, social impairment and ASD data, we assessed the out-of-sample predictive  
333 performance of the CpG methylation-only models using MethylC-seq data from the MARBLES cohort  
334 (GEO GSE67615) [10]. We computed predicted IQ and SRS values for 47 placental samples (24 cases of  
335 ASD) and assessed differences in mean predicted IQ and SRS across ASD case and control groups. The  
336 direction of the association is similar to our data for IQ yet the differences in mean predicted IQ  
337 ( $-0.22$ ,  $P = 0.37$ ) and SRS ( $-0.42$ ,  $P = 0.12$ ) across ASD groups in MARBLES is not significant (**Figure**  
338 **4**). This external validation provides some evidence of the portability of our models and merits further  
339 future validation of these models, as more placental multi-omic datasets are collected.

340

341 **Discussion**

342 We evaluated the predictive capability of three types of genomic and epigenomic molecular biomarkers  
343 (mRNA, CpG methylation, and miRNA) in the placenta on cognitive and social impairment in relation to  
344 ASD at 10 years of age. Genes that play important roles in placenta angiogenesis and neural function  
345 were associated with SRS and IQ. The multi-omic predictions of SRS and IQ are strong and explain up to  
346 8% and 12% of the variance in the observed SRS and IQ variables in 5-fold cross-validation, respectively.  
347 This study supports the utility of aggregating information from biomarkers within and between molecular  
348 datasets to improve prediction of complex neurodevelopmental outcomes like social and intellectual  
349 ability, suggesting that traits on the placenta-brain axis may be omnigenic.

350

351 Several genes with known ties to neurodevelopmental disorders distinguished individuals with and  
352 without intellectual and social impairments. For example, CpG methylation in *SLIT3* was associated with  
353 intellectual (IQ) disability. *SLIT3* is highly expressed in trophoblastic endothelial cells [63] and plays a  
354 critical role in placental angiogenesis and in the development of neuronal connectivity. Human and animal  
355 genetic studies support that *SLIT3* is associated with mood disorders, IQ, and ASD [61,64–66]. *LZTS2*,  
356 another gene we found to be associated with IQ, is involved in regulating embryonic development by the  
357 *Wnt* signaling pathway [67,68]. Genetic and miRNA expression studies have linked *LZTS2* to social  
358 impairment and ASD [69–71]. Furthermore, *LZTS2* is bound by the Chromodomain Helicase DNA Binding  
359 Protein 8 gene (*CHD8*), which is associated with brain development in mice and neurodevelopmental  
360 disorders in humans [72–74]. In relation to social impairment, *ADAMTS6* was found to be associated with  
361 SRS. The *ADAMTS6* gene is a member of the ADAMTS protein family and is regulated by the cytokine  
362 TNF-alpha [75]. In previous studies, *ADAMTS6* has been implicated in intellectual disability and growth  
363 development and with socially affected traits in pigs [76,77].

364

365 Looking into the individual molecular datasets, DNA methylation effects showed the strongest prediction  
366 of both SRS and IQ impairment. There is strong evidence suggesting inverse correlation between DNA  
367 methylation of the first intron and gene expression across tissues and species [78]. We found that many



368 of the CpG loci with the largest effect sizes on SRS and IQ identified in our analysis are located near  
369 DNAase hyperactivity or active regulatory elements for the placenta [79,80], suggesting that these loci  
370 likely play regulatory functions. Experimental studies have demonstrated regions of the genome in which  
371 DNA methylation is causally important for gene regulation and those in which it is effectively silent [81].  
372 We found that aggregating biomarkers within and between molecular datasets improves prediction of  
373 social and cognitive impairment. Specifically, this observation suggests new possibilities to the discovery of  
374 candidate genes in the placenta that convey neurodevelopmental risk, improving the understanding of the  
375 placenta-brain axis. Recent work in transcriptome-wide association studies (TWAS) are a promising tool  
376 that aggregates genetics and transcriptomics to identify candidate trait-associated genes [82,83].  
377 Incorporating information from regulatory biomarkers, like transcription factors and miRNAs, into TWAS  
378 increases study power to generate hypotheses about regulation [84,85]. Given our observations in this  
379 analysis and the number of the integrated molecular datasets, we believe that the ELGAN study can be  
380 used to train predictive models for placental transcriptomics from genetics, enriched for regulatory  
381 elements [85]. These transcriptomic models can then be applied to genome-wide association study  
382 cohorts to study the regulation of gene-trait associations in the placenta.

383

### 384 **Limitations**

385 When interpreting the results of this study, some factors should be considered. Extremely preterm birth is  
386 strongly associated with increased risk for neurodevelopmental disorders [18]. This association may lead  
387 to bias in estimated associations between the molecular biomarkers and outcomes, especially when  
388 unmeasured confounders are linked to both pre-term birth and autism [86]. Still, to our knowledge the  
389 ELGAN cohort is currently the largest available placental repository with both multiple molecular datasets  
390 and long-term neurodevelopmental assessment of the children. Second, as the placenta is comprised of  
391 several heterogeneous cell types, tissue-specific molecular patterns in the placenta should be taken into  
392 consideration when interpreting these findings in relation to other tissue samples; future comparison  
393 between tissues will not be straightforward. Lastly, to test the reproducibility and robustness of our kernel  
394 models, we believe further out-of-sample validation is required, using datasets with larger sample sizes  
395 and similar molecular datasets. Though in-sample predictive performance is strong, platform differences



396 between the ELGAN training set (assayed with EPIC BeadChip) and validation set (MethylC-seq) may  
397 lead to loss of predictive power. As our optimal models all aggregate various datasets, the dearth of data  
398 for the placenta, in the context of social and intellectual impairment, makes out-of-sample validation  
399 especially challenging. Lack of external validation may render our analysis exploratory in nature, but we  
400 provide evidence of a link between molecular features within the fetal placenta and social and cognitive  
401 outcomes in children that merits future investigation.

402

### 403 **Conclusions**

404 Our analysis underscores the importance of synthesizing data representing various levels of biological  
405 data to understand distinct genomic and epigenomic underpinnings of complex developmental deficits,  
406 like intellectual and social impairment. This study provides novel evidence for the omnigenicity of the  
407 placenta-brain axis in the context of social and intellectual impairment.

408

### 409 **List of Abbreviations**

410 Extremely Low Gestational Age Newborn (ELGAN)  
411 Intellectual ability (IQ)  
412 Differential Ability Scales-II (DAS-II)  
413 Social Responsiveness Scale (SRS)  
414 Autism Spectrum Disorder (ASD)  
415 SRS gender-normed T-score (SRS-T)  
416 Epigenome-wide association study (EWAS)  
417 Markers of Autism Risk in Babies-Learning Early Signs (MARBLES)  
418 Kernel regression least squares (KRLS)

419

### 420 **Declarations**

421 *Ethics approval and consent to participate*

422 The study was approved by the Institutional Review Board of the University of North Carolina at Chapel  
423 Hill. All participants consented to the study as per IRB protocol.

424

425 *Consent for publication*

426 Not applicable

427

428 *Availability of data and materials*

429 Multiomic data from the ELGAN study is available from the NCBI Gene Expression Omnibus GSE154829.

430 All genomic and clinical data is also available upon request to H.P.S. For validation, we used MethyIC-

431 seq data from the MARBLES study available at GSE67615.

432

433 *Competing interests*

434 The authors have no competing financial interests to disclose.

435

436 *Funding*

437 This study was supported by grants from the National Institutes of Health (NIH), specifically the National

438 Institute of Neurological Disorders and Stroke (U01NS040069; R01NS040069), the Office of the NIH

439 Director (UG3OD023348), the National Institute of Environmental Health Sciences (T32-ES007018),

440 National Institute of Nursing Research (K23NR017898), and the Eunice Kennedy Shriver National Institute

441 of Child Health and Human Development (R01HD092374).

442

443 *Authors' Contributions*

444 H.S.P, R.M.J., L.S., K.C.K.K., C.J.M., T.M.O, and R.C.F. conceived and designed the study. H.S.P. and

445 A.B. acquired and analyzed the data. H.S.P., A.B. and R.C.F. interpreted data. H.S.P. and A.B. drafted

446 the work and all authors revised. All authors have approved the submitted version and are accountable

447 for their own contributions.

448

449 *Acknowledgements*

450 We would like to thank the study participants of the ELGAN-ECHO study. We would also like to thank

451 Michael Love and Lana Garmire for helpful discussion during the research process.

452 **References**

- 453 1. Hodyl NA, Aboustate N, Bianco-Miotto T, Roberts CT, Clifton VL, Stark MJ. Child neurodevelopmental  
454 outcomes following preterm and term birth: What can the placenta tell us? *Placenta*. W.B. Saunders Ltd;  
455 2017. p. 79–86.
- 456 2. Hu WF, Chahrour MH, Walsh CA. The Diverse Genetic Landscape of Neurodevelopmental Disorders.  
457 *Annu Rev Genomics Hum Genet*. Annual Reviews; 2014;15:195–213.
- 458 3. Agrawal S, Rao SC, Bulsara MK, Patole SK. Prevalence of autism spectrum disorder in preterm  
459 infants: A meta-Analysis. *Pediatrics*. American Academy of Pediatrics; 2018.
- 460 4. Xie S, Heuvelman H, Magnusson C, Rai D, Lyall K, Newschaffer CJ, et al. Prevalence of Autism  
461 Spectrum Disorders with and without Intellectual Disability by Gestational Age at Birth in the Stockholm  
462 Youth Cohort: a Register Linkage Study. *Paediatr Perinat Epidemiol*. Blackwell Publishing Ltd;  
463 2017;31:586–94.
- 464 5. Korzeniewski SJ, Joseph RM, Kim SH, Allred EN, O’Shea TM, Leviton A, et al. Social Responsiveness  
465 Scale Assessment of the Preterm Behavioral Phenotype in 10-Year-Olds Born Extremely Preterm. *J Dev  
466 Behav Pediatr* [Internet]. 2017 [cited 2019 Sep 5];38:697–705. Available from:  
467 <http://insights.ovid.com/crossref?an=00004703-201711000-00003>
- 468 6. Rosenfeld CS. The placenta-brain-axis. *J. Neurosci. Res*. John Wiley and Sons Inc.; 2020.
- 469 7. Rosenfeld CS. Placental serotonin signaling, pregnancy outcomes, and regulation of fetal brain  
470 development†. *Biol Reprod*. Oxford Academic; 2020;102:532–8.
- 471 8. Meakin CJ, Martin EM, Santos HP, Mokrova I, Kuban K, O’Shea TM, et al. Placental CpG methylation  
472 of HPA-axis genes is associated with cognitive impairment at age 10 among children born extremely  
473 preterm. *Horm Behav*. Academic Press Inc.; 2018;101:29–35.
- 474 9. Paquette AG, Houseman EA, Green BB, Lesueur C, Armstrong DA, Lester B, et al. Regions of variable  
475 DNA methylation in human placenta associated with newborn neurobehavior. *Epigenetics* [Internet]. 2016  
476 [cited 2019 Sep 30];11:603–13. Available from: <http://www.ncbi.nlm.nih.gov/pubmed/27366929>
- 477 10. Schroeder DI, Schmidt RJ, Crary-Dooley FK, Walker CK, Ozonoff S, Tancredi DJ, et al. Placental  
478 methylome analysis from a prospective autism study. *Mol Autism* [Internet]. 2016 [cited 2019 Sep  
479 29];7:51. Available from: <http://molecularautism.biomedcentral.com/articles/10.1186/s13229-016-0114-8>

- 480 11. Grove J, Ripke S, Als TD, Mattheisen M, Walters RK, Won H, et al. Identification of common genetic  
481 risk variants for autism spectrum disorder. *Nat Genet* [Internet]. NIH Public Access; 2019 [cited 2019 Aug  
482 30];51:431–44. Available from: <http://www.ncbi.nlm.nih.gov/pubmed/30804558>
- 483 12. Sullivan PF, Agrawal A, Bulik CM, Andreassen OA, Børglum AD, Breen G, et al. Psychiatric  
484 Genomics: An Update and an Agenda. *Am J Psychiatry* [Internet]. NIH Public Access; 2018 [cited 2019  
485 Aug 30];175:15. Available from: <http://www.ncbi.nlm.nih.gov/pubmed/28969442>
- 486 13. Boyle EA, Li YI, Pritchard JK. An Expanded View of Complex Traits: From Polygenic to Omnigenic.  
487 *Cell* [Internet]. Elsevier; 2017 [cited 2019 Jun 7];169:1177–86. Available from:  
488 <http://www.ncbi.nlm.nih.gov/pubmed/28622505>
- 489 14. Liu X, Li YI, Pritchard JK. Trans Effects on Gene Expression Can Drive Omnigenic Inheritance. *Cell*.  
490 *Cell Press*; 2019;177:1022-1034.e6.
- 491 15. Geschwind DH, State MW. Gene hunting in autism spectrum disorder: On the path to precision  
492 medicine [Internet]. *Lancet Neurol*. Lancet Publishing Group; 2015 [cited 2020 Aug 20]. p. 1109–20.  
493 Available from: </pmc/articles/PMC4694565/?report=abstract>
- 494 16. O’Shea TM, Allred EN, Dammann O, Hirtz D, Kuban KCK, Paneth N, et al. The ELGAN study of the  
495 brain and related disorders in extremely low gestational age newborns. *Early Hum Dev*. 2009;85:719–25.
- 496 17. Torske T, Nærlund T, Bettella F, Bjella T, Malt E, Høyland AL, et al. Autism spectrum disorder  
497 polygenic scores are associated with every day executive function in children admitted for clinical  
498 assessment. *Autism Res* [Internet]. John Wiley and Sons Inc.; 2020 [cited 2020 Aug 20];13:207–20.  
499 Available from: <https://onlinelibrary.wiley.com/doi/abs/10.1002/aur.2207>
- 500 18. Joseph RM, O’Shea TM, Allred EN, Heeren T, Hirtz D, Paneth N, et al. Prevalence and associated  
501 features of autism spectrum disorder in extremely low gestational age newborns at age 10 years. *Autism*  
502 *Res* [Internet]. John Wiley & Sons, Ltd; 2017 [cited 2019 Sep 5];10:224–32. Available from:  
503 <http://www.ncbi.nlm.nih.gov/pubmed/27220677>
- 504 19. Joseph RM, O’Shea TM, Allred EN, Heeren T, Hirtz D, Jara H, et al. Neurocognitive and Academic  
505 Outcomes at Age 10 Years of Extremely Preterm Newborns. *Pediatrics* [Internet]. American Academy of  
506 *Pediatrics*; 2016 [cited 2019 Sep 5];137:e20154343. Available from:  
507 <http://www.ncbi.nlm.nih.gov/pubmed/27006473>

- 508 20. Beran TN, Elliott, C. D. (2007). *Differential Ability Scales* (2nd ed.). San Antonio, TX: Harcourt  
509 Assessment. *Can J Sch Psychol* [Internet]. Sage PublicationsSage CA: Los Angeles, CA; 2007 [cited  
510 2019 Sep 5];22:128–32. Available from: <http://journals.sagepub.com/doi/10.1177/0829573507302967>
- 511 21. Constantino JN, Davis SA, Todd RD, Schindler MK, Gross MM, Brophy SL, et al. Validation of a brief  
512 quantitative measure of autistic traits: comparison of the social responsiveness scale with the autism  
513 diagnostic interview-revised. *J Autism Dev Disord* [Internet]. 2003 [cited 2019 Sep 5];33:427–33.  
514 Available from: <http://www.ncbi.nlm.nih.gov/pubmed/12959421>
- 515 22. Constantino JN, Zhang Y, Frazier T, Abbacchi AM, Law P. Sibling Recurrence and the Genetic  
516 Epidemiology of Autism. *Am J Psychiatry* [Internet]. 2010 [cited 2019 Sep 5];167:1349–56. Available  
517 from: <http://www.ncbi.nlm.nih.gov/pubmed/20889652>
- 518 23. Rutter, Bailey, Lord. *The social communication questionnaire*. Western Ps. Los Angeles; 2003.
- 519 24. Risi S, Lord C, Gotham K, Corsello C, Chrysler C, Szatmari P, et al. Combining information from  
520 multiple sources in the diagnosis of autism spectrum disorders. *J Am Acad Child Adolesc Psychiatry*  
521 [Internet]. Elsevier; 2006 [cited 2019 Sep 5];45:1094–103. Available from:  
522 <http://www.ncbi.nlm.nih.gov/pubmed/16926617>
- 523 25. Lord C, Rutter M, DiLavore P, Risi S, Gotham K, Bishop S. *Autism Diagnostic Observation Schedule*.  
524 Los Angeles: Western Psychological Corporation; 2012.
- 525 26. Addo KA, Bulka C, Dhingra R, Santos HP, Jr, Smeester L, et al. Acetaminophen use during  
526 pregnancy and DNA methylation in the placenta of the extremely low gestational age newborn (ELGAN)  
527 cohort. *Environ Epigenetics*. Oxford University Press; 2019;5.
- 528 27. Santos HP, Bhattacharya A, Martin EM, Addo K, Psioda M, Smeester L, et al. Epigenome-wide DNA  
529 methylation in placentas from preterm infants: association with maternal socioeconomic status.  
530 *Epigenetics* [Internet]. Taylor and Francis Inc.; 2019 [cited 2019 Aug 4];14:751–65. Available from:  
531 <http://www.ncbi.nlm.nih.gov/pubmed/31062658>
- 532 28. Bulka CM, Dammann O, Santos HP, VanderVeen DK, Smeester L, Fichorova R, et al. Placental CpG  
533 methylation of inflammation, angiogenic, and neurotrophic genes and retinopathy of prematurity. *Investig*  
534 *Ophthalmol Vis Sci*. Association for Research in Vision and Ophthalmology Inc.; 2019;60:2888–94.
- 535 29. Clark J, Martin E, Bulka CM, Smeester L, Santos HP, O'Shea TM, et al. Associations between

- 536 placental CpG methylation of metastable epialleles and childhood body mass index across ages one, two  
537 and ten in the Extremely Low Gestational Age Newborns (ELGAN) cohort. *Epigenetics*. Taylor and  
538 Francis Inc.; 2019;14:1102–11.
- 539 30. Aryee MJ, Jaffe AE, Corrada-Bravo H, Ladd-Acosta C, Feinberg AP, Hansen KD, et al. Minfi: a  
540 flexible and comprehensive Bioconductor package for the analysis of Infinium DNA methylation  
541 microarrays. *Bioinformatics* [Internet]. 2014 [cited 2019 Aug 4];30:1363–9. Available from:  
542 <http://www.ncbi.nlm.nih.gov/pubmed/24478339>
- 543 31. Fortin J-P, Labbe A, Lemire M, Zanke BW, Hudson TJ, Fertig EJ, et al. Functional normalization of  
544 450k methylation array data improves replication in large cancer studies. *Genome Biol* [Internet]. 2014  
545 [cited 2019 Aug 4];15:503. Available from:  
546 <http://genomebiology.biomedcentral.com/articles/10.1186/s13059-014-0503-2>
- 547 32. Johnson WE, Li C, Rabinovic A. Adjusting batch effects in microarray expression data using empirical  
548 Bayes methods. *Biostatistics* [Internet]. 2007 [cited 2019 Aug 4];8:118–27. Available from:  
549 <https://academic.oup.com/biostatistics/article/8/1/118/252073>
- 550 33. Triche TJ, Weisenberger DJ, Van Den Berg D, Laird PW, Siegmund KD. Low-level processing of  
551 Illumina Infinium DNA Methylation BeadArrays. *Nucleic Acids Res* [Internet]. Oxford University Press;  
552 2013 [cited 2020 Aug 14];41:e90. Available from: </pmc/articles/PMC3627582/?report=abstract>
- 553 34. Fortin JP, Triche TJ, Hansen KD. Preprocessing, normalization and integration of the Illumina  
554 HumanMethylationEPIC array with minfi. *Bioinformatics* [Internet]. Oxford University Press; 2017 [cited  
555 2020 Aug 14];33:558–60. Available from: </pmc/articles/PMC5408810/?report=abstract>
- 556 35. Du P, Zhang X, Huang C-C, Jafari N, Kibbe WA, Hou L, et al. Comparison of Beta-value and M-value  
557 methods for quantifying methylation levels by microarray analysis. *BMC Bioinformatics* [Internet]. 2010  
558 [cited 2019 Dec 4];11:587. Available from:  
559 <https://bmcbioinformatics.biomedcentral.com/articles/10.1186/1471-2105-11-587>
- 560 36. Patro R, Duggal G, Love MI, Irizarry RA, Kingsford C. Salmon provides fast and bias-aware  
561 quantification of transcript expression. *Nat Methods* [Internet]. 2017 [cited 2019 Aug 5];14:417–9.  
562 Available from: <http://www.ncbi.nlm.nih.gov/pubmed/28263959>
- 563 37. Qi Z, Wang L, Desai K, Cogswell J, Stern M, Lawson B, et al. Reliable Gene Expression Profiling from

- 564 Small and Hematoxylin and Eosin–Stained Clinical Formalin-Fixed, Paraffin-Embedded Specimens Using  
565 the HTG EdgeSeq Platform. *J Mol Diagnostics*. Elsevier B.V.; 2019;21:796–807.
- 566 38. Bullard JH, Purdom E, Hansen KD, Dudoit S. Evaluation of statistical methods for normalization and  
567 differential expression in mRNA-Seq experiments. *BMC Bioinformatics* [Internet]. BioMed Central; 2010  
568 [cited 2019 Mar 22];11:94. Available from:  
569 <https://bmcbioinformatics.biomedcentral.com/articles/10.1186/1471-2105-11-94>
- 570 39. Risso D, Ngai J, Speed TP, Dudoit S. Normalization of RNA-seq data using factor analysis of control  
571 genes or samples. *Nat Biotechnol* [Internet]. Nature Publishing Group; 2014 [cited 2019 Aug 5];32:896–  
572 902. Available from: <http://www.nature.com/articles/nbt.2931>
- 573 40. Gagnon-Bartsch JA, Speed TP. Using control genes to correct for unwanted variation in microarray  
574 data. *Biostatistics* [Internet]. Oxford University Press; 2012 [cited 2019 Sep 15];13:539–52. Available  
575 from: <http://www.ncbi.nlm.nih.gov/pubmed/22101192>
- 576 41. Risso D, Ngai J, Speed TP, Dudoit S. Normalization of RNA-seq data using factor analysis of control  
577 genes or samples. *Nat Biotechnol* [Internet]. Nature Publishing Group; 2014 [cited 2019 Mar 22];32:896–  
578 902. Available from: <http://www.nature.com/articles/nbt.2931>
- 579 42. Phipson B, Lee S, Majewski IJ, Alexander WS, Smyth GK. ROBUST HYPERPARAMETER  
580 ESTIMATION PROTECTS AGAINST HYPERVARIABLE GENES AND IMPROVES POWER TO  
581 DETECT DIFFERENTIAL EXPRESSION. *Ann Appl Stat* [Internet]. NIH Public Access; 2016 [cited 2019  
582 Aug 5];10:946–63. Available from: <http://www.ncbi.nlm.nih.gov/pubmed/28367255>
- 583 43. Love MI, Huber W, Anders S. Moderated estimation of fold change and dispersion for RNA-seq data  
584 with DESeq2. *Genome Biol* [Internet]. BioMed Central; 2014 [cited 2019 Mar 22];15:550. Available from:  
585 <http://genomebiology.biomedcentral.com/articles/10.1186/s13059-014-0550-8>
- 586 44. Benjamini Y, Hochberg Y. Controlling the False Discovery Rate: A Practical and Powerful Approach to  
587 Multiple [Internet]. *Source J. R. Stat. Soc. Ser. B*. 1995. Available from:  
588 <https://www.jstor.org/stable/pdf/2346101.pdf?refreqid=excelsior%3A6411207ed4b0feb82c3964cc8b8151>  
589 cb
- 590 45. Tsai P-C, Bell JT. Power and sample size estimation for epigenome-wide association scans to detect  
591 differential DNA methylation. *Int J Epidemiol* [Internet]. 2015 [cited 2019 Aug 5];44:1429–41. Available



- 592 from: <https://academic.oup.com/ije/article-lookup/doi/10.1093/ije/dyv041>
- 593 46. Ritchie ME, Phipson B, Wu D, Hu Y, Law CW, Shi W, et al. limma powers differential expression  
594 analyses for RNA-sequencing and microarray studies. *Nucleic Acids Res* [Internet]. Oxford University  
595 Press; 2015 [cited 2019 Aug 5];43:e47–e47. Available from:  
596 <http://www.ncbi.nlm.nih.gov/pubmed/25605792>
- 597 47. Morota G, Gianola D. Kernel-based whole-genome prediction of complex traits: a review. *Front Genet*  
598 [Internet]. Frontiers Media SA; 2014 [cited 2019 Aug 30];5:363. Available from:  
599 <http://www.ncbi.nlm.nih.gov/pubmed/25360145>
- 600 48. Zhu B, Song N, Shen R, Arora A, Machiela MJ, Song L, et al. Integrating Clinical and Multiple Omics  
601 Data for Prognostic Assessment across Human Cancers. *Sci Rep* [Internet]. Nature Publishing Group;  
602 2017 [cited 2019 Aug 27];7:16954. Available from: <http://www.nature.com/articles/s41598-017-17031-8>
- 603 49. Elisseeff A, Technologies B, Shawe-Taylor J, Holloway R, Kandola J. On Kernel-Target Alignment N  
604 ello Cristianini B IOwulf Technologies nello@support-vector.net [Internet]. Available from:  
605 <https://papers.nips.cc/paper/1946-on-kernel-target-alignment.pdf>
- 606 50. Endelman JB. Ridge Regression and Other Kernels for Genomic Selection with R Package rrBLUP.  
607 *Plant Genome*. 2011;4:250–5.
- 608 51. Zhu W, Hu B, Becker C, Doğan ES, Berendzen KW, Weigel D, et al. Altered chromatin compaction  
609 and histone methylation drive non-additive gene expression in an interspecific *Arabidopsis* hybrid.  
610 *Genome Biol* [Internet]. BioMed Central Ltd.; 2017 [cited 2020 Aug 14];18:1–16. Available from:  
611 <https://genomebiology.biomedcentral.com/articles/10.1186/s13059-017-1281-4>
- 612 52. Zeng Y, Amador C, Xia C, Marioni R, Sproul D, Walker RM, et al. Parent of origin genetic effects on  
613 methylation in humans are common and influence complex trait variation. *Nat Commun* [Internet]. Nature  
614 Publishing Group; 2019 [cited 2020 Aug 14];10:1–13. Available from: [https://doi.org/10.1038/s41467-019-](https://doi.org/10.1038/s41467-019-09301-y)  
615 [09301-y](https://doi.org/10.1038/s41467-019-09301-y)
- 616 53. Hainmueller J, Hazlett C. Kernel Regularized Least Squares: Reducing Misspecification Bias with a  
617 Flexible and Interpretable Machine Learning Approach. *Polit Anal* [Internet]. 2014 [cited 2019 Sep  
618 5];22:143–68. Available from: <http://pan.oxfordjournals.org/>
- 619 54. Xu QS, Liang YZ. Monte Carlo cross validation. *Chemom Intell Lab Syst*. Elsevier; 2001;56:1–11.



- 620 55. Friedman J, Hastie T, Tibshirani R. Sparse inverse covariance estimation with the graphical lasso.  
621 *Biostatistics*. 2007;1–10.
- 622 56. Epskamp S, Cramer AOJ, Waldorp LJ, Schmittmann VD, Borsboom D. Qgraph: Network  
623 visualizations of relationships in psychometric data. *J Stat Softw*. 2012;48.
- 624 57. Crawley JN, Heyer WD, LaSalle JM. Autism and Cancer Share Risk Genes, Pathways, and Drug  
625 Targets. *Trends Genet*. Elsevier Ltd; 2016. p. 139–46.
- 626 58. Chater-Diehl E, Ejaz R, Cytrynbaum C, Siu MT, Turinsky A, Choufani S, et al. New insights into DNA  
627 methylation signatures: SMARCA2 variants in Nicolaides-Baraitser syndrome. *BMC Med Genomics*  
628 [Internet]. BioMed Central Ltd.; 2019 [cited 2020 Apr 22];12:105. Available from:  
629 <https://bmcmmedgenomics.biomedcentral.com/articles/10.1186/s12920-019-0555-y>
- 630 59. Tang S, Hughes E, Lascelles K, Simpson MA, Pal DK, Marini C, et al. New SMARCA2 mutation in a  
631 patient with Nicolaides–Baraitser syndrome and myoclonic astatic epilepsy. *Am J Med Genet Part A*.  
632 Wiley-Liss Inc.; 2017;173:195–9.
- 633 60. Koga M, Ishiguro H, Yazaki S, Horiuchi Y, Arai M, Niizato K, et al. Involvement of SMARCA2/BRM in  
634 the SWI/SNF chromatin-remodeling complex in schizophrenia. *Hum Mol Genet* [Internet]. 2009 [cited  
635 2020 Apr 25];18:2483–94. Available from: [http://snp.ims.u-tokyo.ac.jp/cgi-bin/SnpInfo.cgi?SNP\\_ID=IMS-](http://snp.ims.u-tokyo.ac.jp/cgi-bin/SnpInfo.cgi?SNP_ID=IMS-)  
636 [JST050328](http://snp.ims.u-tokyo.ac.jp/cgi-bin/SnpInfo.cgi?SNP_ID=IMS-JST050328).
- 637 61. Glessner JT, Wang K, Sleiman PMA, Zhang H, Kim CE, Flory JH, et al. Duplication of the slit3 locus  
638 on 5q35.1 predisposes to major depressive disorder. *PLoS One*. Public Library of Science; 2010;5.
- 639 62. Thiffault I, Zuccarelli B, Welsh H, Yuan X, Farrow E, Zellmer L, et al. Hypotonia and intellectual  
640 disability without dysmorphic features in a patient with PIGN-related disease. *BMC Med Genet* [Internet].  
641 BioMed Central Ltd.; 2017 [cited 2020 Apr 25];18:124. Available from:  
642 <http://bmcmmedgenet.biomedcentral.com/articles/10.1186/s12881-017-0481-9>
- 643 63. Liao W-X, Laurent LC, Agent S, Hodges J, Chen D. Human Placental Expression of SLIT/ROBO  
644 Signaling Cues: Effects of Preeclampsia and Hypoxia1. *Biol Reprod*. Oxford University Press (OUP);  
645 2012;86.
- 646 64. Cukier HN, Dueker ND, Slifer SH, Lee JM, Whitehead PL, Lalanne E, et al. Exome sequencing of  
647 extended families with autism reveals genes shared across neurodevelopmental and neuropsychiatric

648 disorders. Mol Autism [Internet]. BioMed Central; 2014 [cited 2020 Apr 22];5:1. Available from:  
649 <http://molecularautism.biomedcentral.com/articles/10.1186/2040-2392-5-1>

650 65. Christoforou A, Espeseth T, Davies G, Fernandes CPD, Giddaluru S, Mattheisen M, et al. GWAS-  
651 based pathway analysis differentiates between fluid and crystallized intelligence. Genes, Brain Behav.  
652 Blackwell Publishing Ltd; 2014;13:663–74.

653 66. Park SM, Plachez C, Huang S. Sex-dependent motor deficit and increased anxiety-like states in mice  
654 lacking autism-associated gene slit3. Front Behav Neurosci. Frontiers Media S.A.; 2018;12.

655 67. Stalman SE, Solanky N, Ishida M, Alemán-Charlet C, Abu-Amero S, Alders M, et al. Genetic Analyses  
656 in Small-for-Gestational-Age Newborns. J Clin Endocrinol Metab [Internet]. Oxford University Press; 2018  
657 [cited 2020 Apr 22];103:917–25. Available from:  
658 <https://academic.oup.com/jcem/article/103/3/917/4801232>

659 68. Thyssen G, Li T-H, Lehmann L, Zhuo M, Sharma M, Sun Z. LZTS2 Is a Novel  $\beta$ -Catenin-Interacting  
660 Protein and Regulates the Nuclear Export of  $\beta$ -Catenin. Mol Cell Biol. American Society for Microbiology;  
661 2006;26:8857–67.

662 69. Chang Y, Lin C, Huang H, Chang J, Kuo H. Chromosomal microarray and whole-exome sequence  
663 analysis in Taiwanese patients with autism spectrum disorder. Mol Genet Genomic Med [Internet]. Wiley-  
664 Blackwell; 2019 [cited 2020 Apr 22];7. Available from:  
665 <https://onlinelibrary.wiley.com/doi/abs/10.1002/mgg3.996>

666 70. Connolly JJ, Glessner JT, Hakonarson H. A Genome-Wide Association Study of Autism Incorporating  
667 Autism Diagnostic Interview-Revised, Autism Diagnostic Observation Schedule, and Social  
668 Responsiveness Scale. Child Dev. Child Dev; 2013;84:17–33.

669 71. Lackinger M, Sungur AÖ, Daswani R, Soutschek M, Bicker S, Stemmler L, et al. A placental mammal-  
670 specific micro RNA cluster acts as a natural brake for sociability in mice. EMBO Rep [Internet]. EMBO;  
671 2019 [cited 2020 Apr 30];20. Available from:  
672 <https://onlinelibrary.wiley.com/doi/abs/10.15252/embr.201846429>

673 72. Gompers AL, Su-Feher L, Ellegood J, Copping NA, Riyadh MA, Stradleigh TW, et al. Germline Chd8  
674 haploinsufficiency alters brain development in mouse. Nat Neurosci. Nature Publishing Group;  
675 2017;20:1062–73.

- 676 73. Sugathan A, Biagioli M, Golzio C, Erdin S, Blumenthal I, Manavalan P, et al. CHD8 regulates  
677 neurodevelopmental pathways associated with autism spectrum disorder in neural progenitors. *Proc Natl*  
678 *Acad Sci U S A*. National Academy of Sciences; 2014;111:E4468–77.
- 679 74. Yasin H, Gibson WT, Langlois S, Stowe RM, Tsang ES, Lee L, et al. A distinct neurodevelopmental  
680 syndrome with intellectual disability, autism spectrum disorder, characteristic facies, and macrocephaly is  
681 caused by defects in CHD8. *J Hum Genet*. Nature Publishing Group; 2019;64:271–80.
- 682 75. Kelwick R, Desanlis I, Wheeler GN, Edwards DR. The ADAMTS (A Disintegrin and Metalloproteinase  
683 with Thrombospondin motifs) family. *Genome Biol* [Internet]. BioMed Central Ltd.; 2015 [cited 2020 May  
684 12];16:113. Available from: [https://genomebiology.biomedcentral.com/articles/10.1186/s13059-015-0676-](https://genomebiology.biomedcentral.com/articles/10.1186/s13059-015-0676-3)  
685 3
- 686 76. Malli T, Duba HC, Erdel M, Marschon R, Kranewitter W, Deutschbauer S, et al. Disruption of the  
687 ARID1B and ADAMTS6 loci due to a t(5;6)(q12.3;q25.3) in a patient with developmental delay. *Am J Med*  
688 *Genet Part A* [Internet]. Wiley-Liss Inc.; 2014 [cited 2020 May 12];164:3126–31. Available from:  
689 <http://www.ncbi.nlm.nih.gov/pubmed/25250687>
- 690 77. Wu P, Wang K, Yang Q, Zhou J, Chen D, Liu Y, et al. Whole-genome re-sequencing association  
691 study for direct genetic effects and social genetic effects of six growth traits in Large White pigs. *Sci Rep*.  
692 Nature Publishing Group; 2019;9:1–12.
- 693 78. Anastasiadi D, Esteve-Codina A, Piferrer F. Consistent inverse correlation between DNA methylation  
694 of the first intron and gene expression across tissues and species. *Epigenetics Chromatin* [Internet]. 2018  
695 [cited 2020 Jan 19];11:37. Available from:  
696 <https://epigeneticsandchromatin.biomedcentral.com/articles/10.1186/s13072-018-0205-1>
- 697 79. Roadmap Epigenomics Consortium, Kundaje A, Meuleman W, Ernst J, Bilenky M, Yen A, et al.  
698 Integrative analysis of 111 reference human epigenomes. *Nature*. Nature Publishing Group;  
699 2015;518:317–29.
- 700 80. Davis CA, Hitz BC, Sloan CA, Chan ET, Davidson JM, Gabdank I, et al. The Encyclopedia of DNA  
701 elements (ENCODE): Data portal update. *Nucleic Acids Res*. Oxford University Press; 2018;46:D794--  
702 D801.
- 703 81. Lea AJ, Vockley CM, Johnston RA, Del Carpio CA, Barreiro LB, Reddy TE, et al. Genome-wide

704 quantification of the effects of DNA methylation on human gene regulation. *Elife*. eLife Sciences  
705 Publications Ltd; 2018;7.

706 82. Gamazon ER, Wheeler HE, Shah KP, Mozaffari S V, Aquino-Michaels K, Carroll RJ, et al. A gene-  
707 based association method for mapping traits using reference transcriptome data. *Nat Genet* [Internet].  
708 Nature Publishing Group; 2015 [cited 2019 Apr 6];47:1091–8. Available from:  
709 <http://www.nature.com/articles/ng.3367>

710 83. Gusev A, Ko A, Shi H, Bhatia G, Chung W, Penninx BWJH, et al. Integrative approaches for large-  
711 scale transcriptome-wide association studies. *Nat Genet* [Internet]. 2016 [cited 2019 Apr 6];48:245–52.  
712 Available from: <http://www.ncbi.nlm.nih.gov/pubmed/26854917>

713 84. Zhang W, Voloudakis G, Rajagopal VM, Readhead B, Dudley JT, Schadt EE, et al. Integrative  
714 transcriptome imputation reveals tissue-specific and shared biological mechanisms mediating  
715 susceptibility to complex traits. *Nat Commun* [Internet]. Nature Publishing Group; 2019 [cited 2019 Oct  
716 2];10:3834. Available from: <http://www.nature.com/articles/s41467-019-11874-7>

717 85. Bhattacharya A, Love MI. Multi-omic strategies for transcriptome-wide prediction and association  
718 studies. *bioRxiv*. Cold Spring Harbor Laboratory; 2020;2020.04.17.047225.

719 86. Paternoster L, Tilling K, Davey Smith G. Genetic epidemiology and Mendelian randomization for  
720 informing disease therapeutics: Conceptual and methodological challenges. Barsh GS, editor. *PLOS*  
721 *Genet* [Internet]. Public Library of Science; 2017 [cited 2019 Jul 15];13:e1006944. Available from:  
722 <https://dx.plos.org/10.1371/journal.pgen.1006944>

723

## **Figure Captions**

**Figure 1: Scheme for kernel aggregation and prediction models.** (1) Design matrices for CpG sites, mRNAs, and miRNAs are aggregated to form a linear or Gaussian kernel matrix that measures the similarity of samples. (2) Clinical variables are regressed out of the outcomes IQ and SRS and from the omic kernels to limit influence from these variables. (3) Using 50-fold Monte Carlo cross-validation on 75%-25% training-test splits, we train prediction models with the kernel matrices for IQ and SRS in the training set and predict in the test sets. Prediction is assessed in every fold with adjusted  $R^2$  and averaged for an overall prediction metric.

**Figure 2: Associations between SRS, IQ, and ASD and with clinical variables.** (A) Scatter plot of SRS (X-axis) and IQ (Y-axis) colored by ASD case (orange) and control (blue) status. (B) Boxplots of SRS and IQ across ASD case-control status.  $P$ -value from a two-sample Mann-Whitney test is provided. (C) Caterpillar plot of multivariable linear regression parameters of IQ and SRS using clinical variables. Points give the regression parameter estimates with error bars showing the 95% FDR-adjusted confidence intervals [44]. The null value of 0 is provided for reference with the dotted line.

**Figure 3: In-sample predictive performance of kernel models.** (A) Adjusted mean  $R^2$  (Y-axis) of best kernel models over various numbers of the top biomarkers (X-axis) in the CpG (dark blue), miRNA (orange), and mRNA (light blue) omics over 50 Monte Carlo folds. The X-axis scale is logarithmic. (B) Bar plots of adjusted mean  $R^2$  (Y-axis) for optimally tuned kernel predictive models using all combinations of omics (X-axis) over 50 Monte Carlo folds. The error bar gives a spread of one standard deviation around the mean adjusted  $R^2$ .

**Figure 4: Association of ASD case/control status with predicted SRS and IQ.** (A) Box-plots of in-sample predicted IQ (left) and SRS (right) over ASD case/control in ELGAN over 10-fold cross-validation. (B) Box-plots of out-sample predicted IQ (left) and SRS (right) over ASD case/control in MARBLES external validation dataset.  $P$ -values presented as from a Mann-Whitney test of differences across the ASD case/control groups.

### **Genome-wide molecular associations with IQ and SRS**

**Objective:** Find biomarkers associated with outcomes

**Methods:** DEG analysis for mRNA/miRNA, EWAS for CpG sites

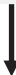

### **Clinical/demographic associations with IQ and SRS**

**Objective:** Find clinical/demographic variables associated with IQ and SRS

**Methods:** Multivariable linear regression with least squares

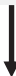

### **Kernel aggregation of molecular profiles**

**Objective:** Combine molecular profiles based on inter-sample similarities

**Methods:** Linear or Gaussian kernel functions with full width

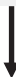

### **Feature selection of molecular kernels**

**Objective:** Find the optimal number of CpGs, mRNAs, and miRNAs for prediction

**Methods:** Monte Carlo cross-validation across various numbers of top biomarkers

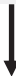

### **Predictive modeling using molecular kernels**

**Objective:** Assess predictive power of combinations of molecular profiles on outcome using Monte Carlo cross-validation

**Methods:** Linear mixed modeling or kernel-based least squares

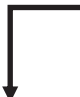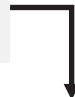

### **Out-of-sample validation**

**Objective:** Assess portability of models in external data

**Methods:** Prediction in MethylC-seq data from MARBLES using the optimal methylation-only kernel model

### **Correlative sparse networks of biomarkers**

**Objective:** Identify inter-biomarker correlations

**Methods:** Graphical lasso using the top 50 most predictive CpGs, mRNAs, and miRNAs from the final predictive models

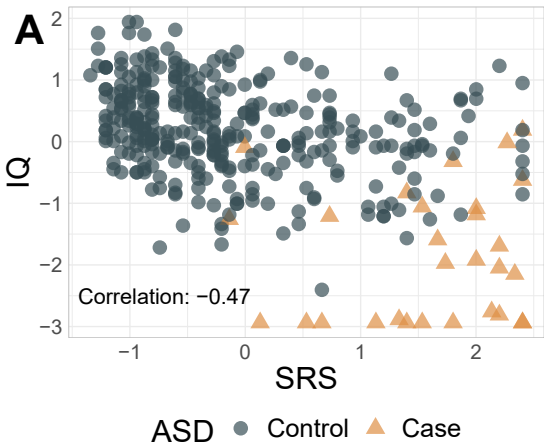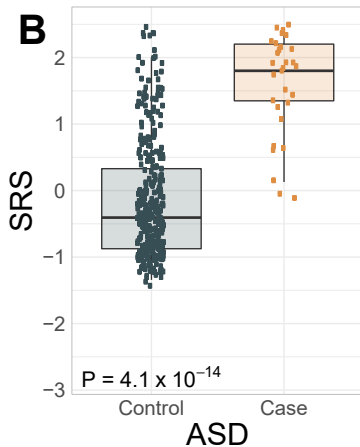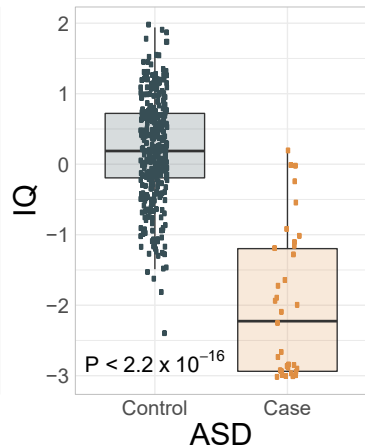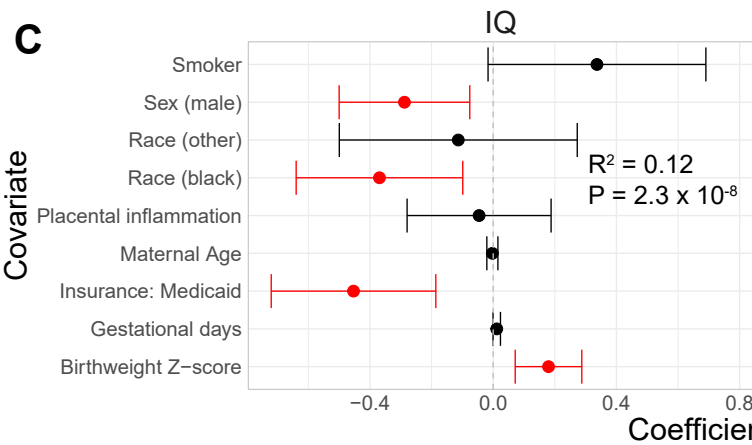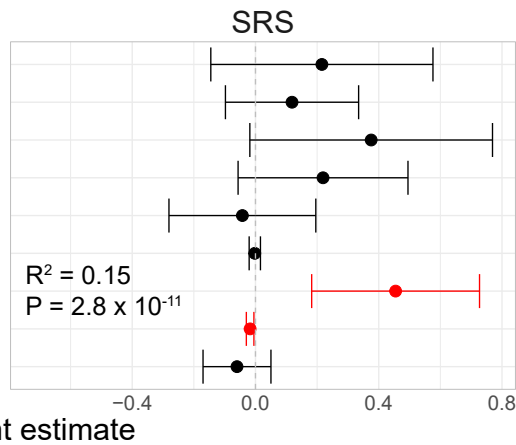

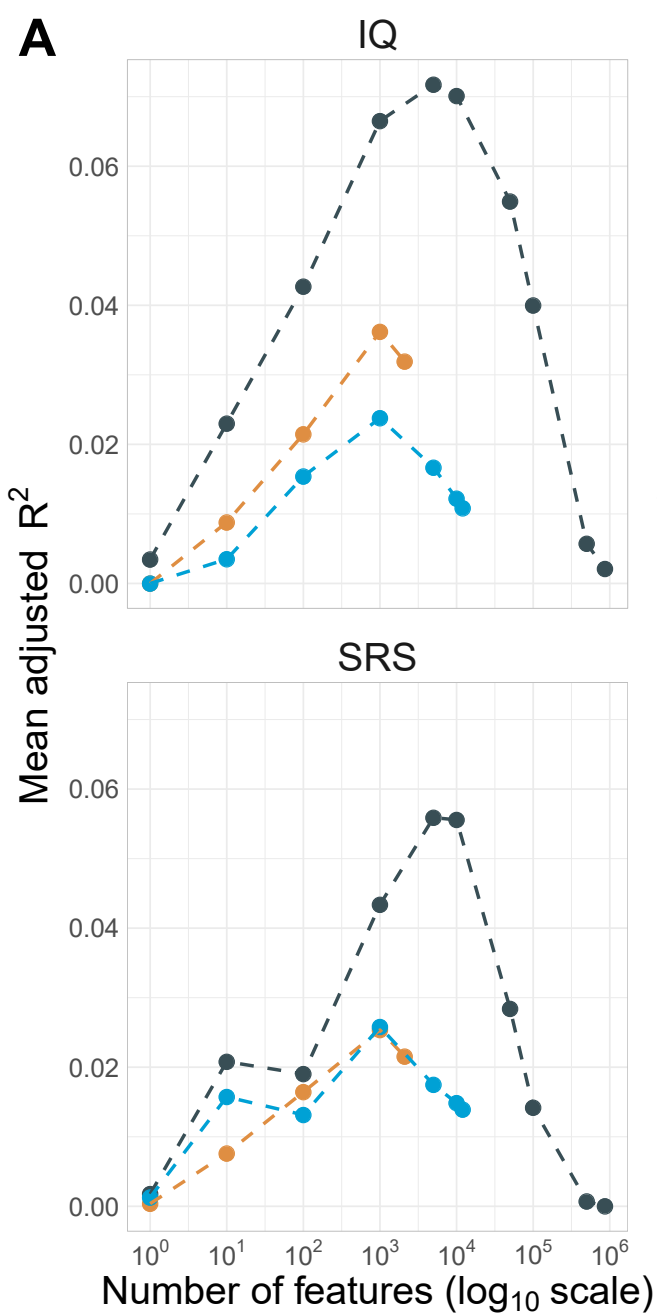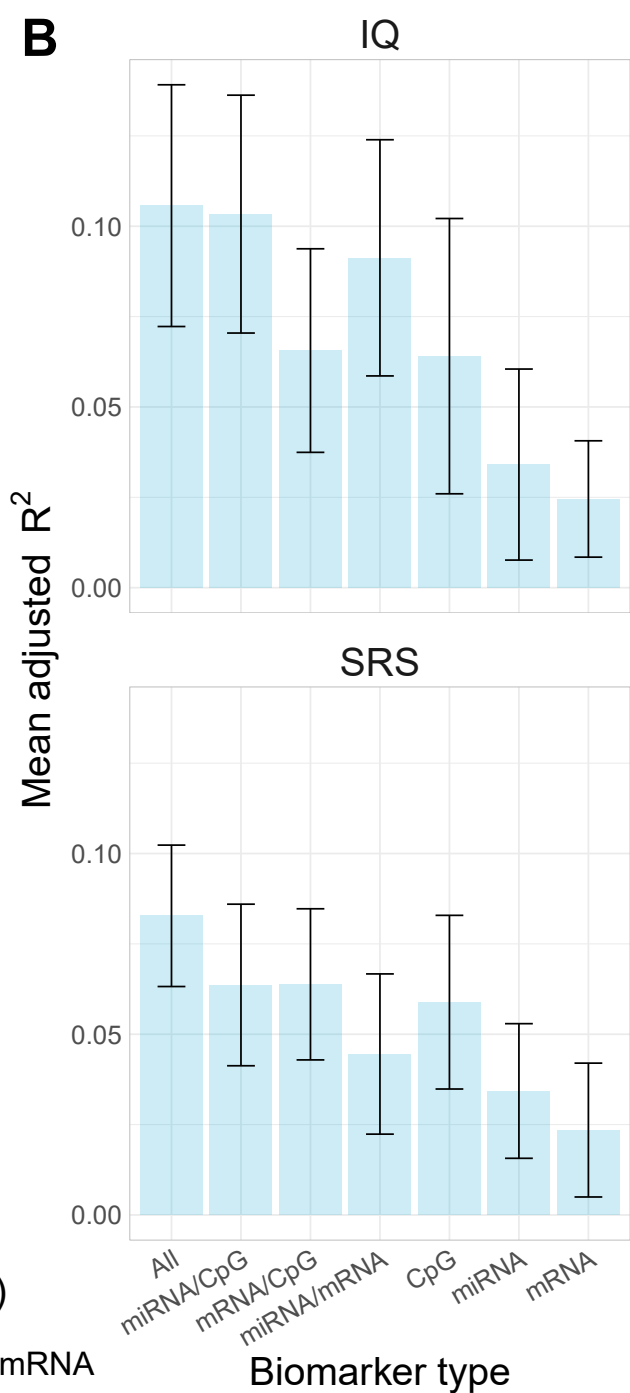



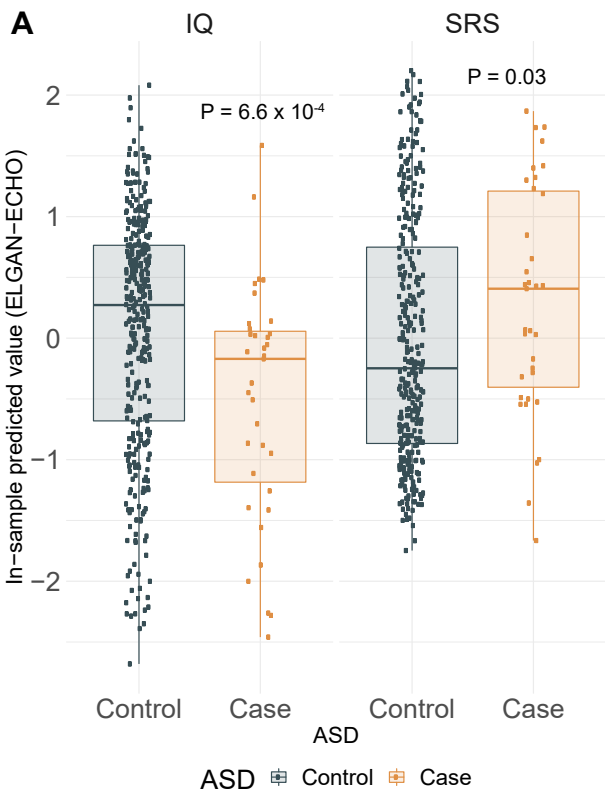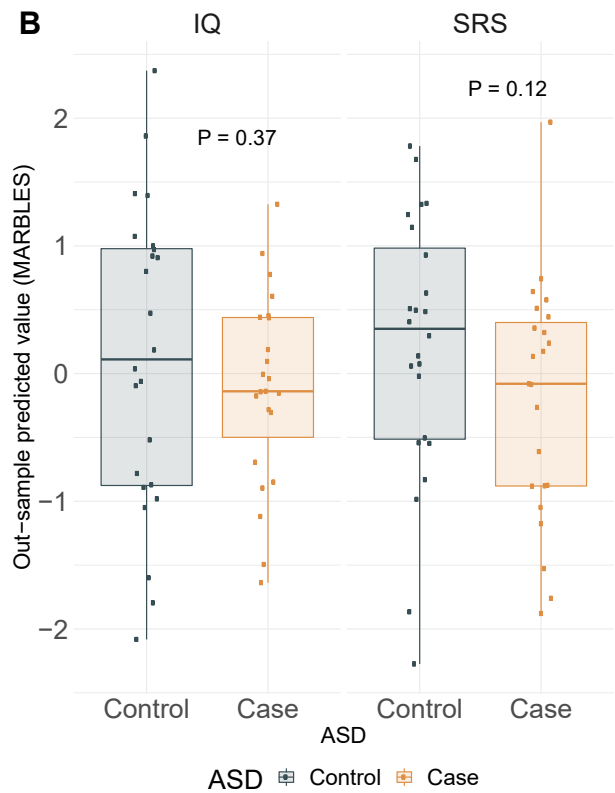

Source: https://www.biorxiv.org/content/10.1101/2020.07.19.211029v2.full.pdf
